# Supplementary material for: Curli mediate bacterial adhesion to fibronectin via tensile multiple bonds
Source: PubMed Central journal article supplement (PMC5031991; doi:10.1038/srep33909), 2016-09-22
Supplement: srep33909-s1.pdf [file srep33909-s1.pdf]

## SUPPLEMENTARY INFORMATION

### **Curli mediate bacterial adhesion to fibronectin via tensile multiple bonds**

Yoo Jin Oh<sup>1\*</sup>, Michael Hubauer-Brenner<sup>1,2</sup>, Hermann J. Gruber<sup>1</sup>, Yidan Cui<sup>3</sup>, Lukas Traxler<sup>1</sup>, Christine Siligan<sup>1</sup>, Sungsu Park<sup>3,4</sup>, and Peter Hinterdorfer<sup>1,2\*</sup>

<sup>1</sup>Institute of Biophysics, Johannes Kepler University Linz, Gruberstrasse 40, 4020 Linz, Austria

<sup>2</sup>Center for Advanced Bioanalysis (CBL), Gruberstrasse 40, 4020 Linz, Austria

<sup>3</sup>Mechanobiology Institute, National University of Singapore, Singapore 117411, Singapore

<sup>4</sup>School of Mechanical Engineering, Sungkyunkwan University, Suwon 440746, Korea

\*Correspondence to [yoo\\_jin.oh@jku.at](mailto:yoo_jin.oh@jku.at), [peter.hinterdorfer@jku.at](mailto:peter.hinterdorfer@jku.at)

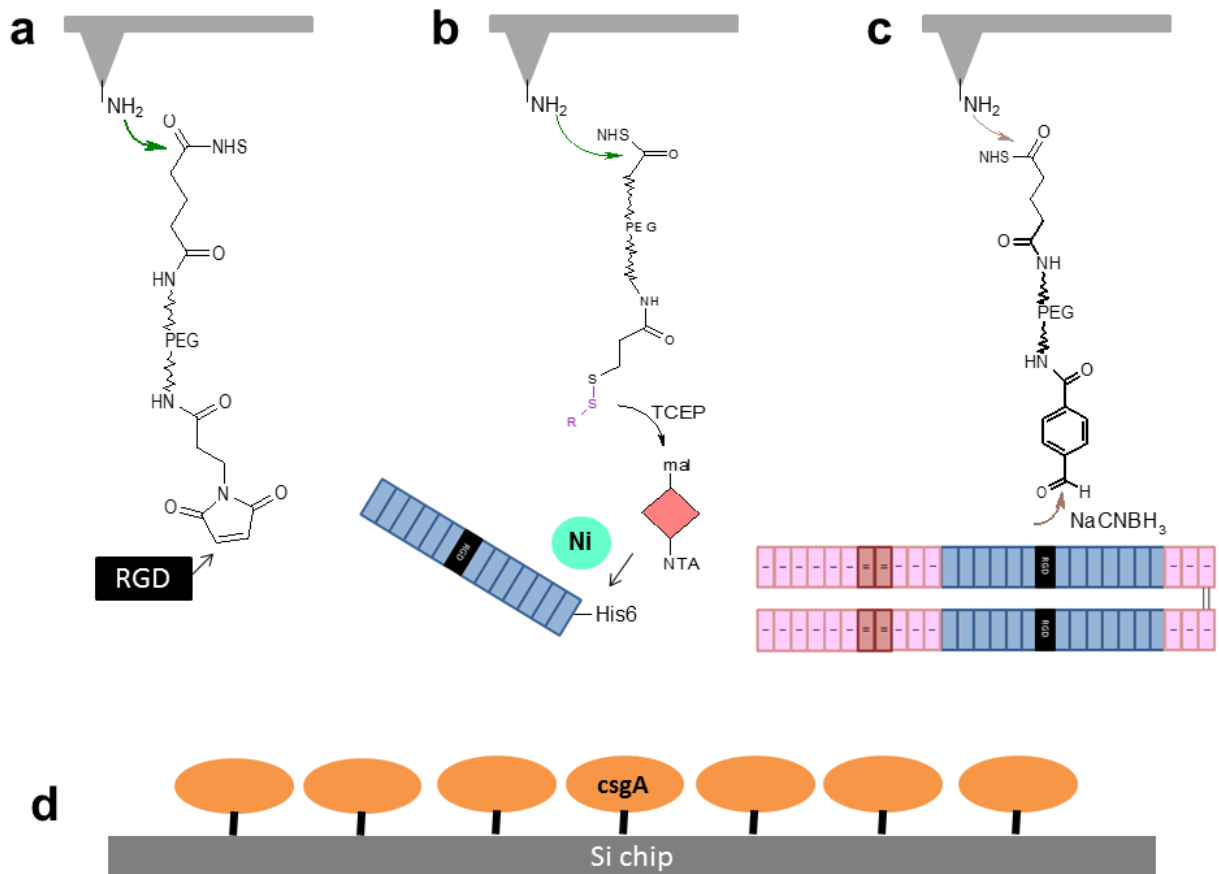

**Figure S1| Scheme of immobilization strategy for single molecular force spectroscopy experiments.** Tip and probe surfaces were amino-functionalized as a first step, before a flexible poly(ethylene glycol) (PEG) linker was added. In the final coupling step, proteins were bound to different end groups of the PEG linker. **a**, RGD peptide was bound to maleimide-PEG via cysteine. **b**, Fibronectin domain III (FN III) to tris-nitrilotriacetic acid (NTA)-PEG via C-terminal his<sub>6</sub> tag. **c**, Fibronectin (FN) to aldehyde-PEG linker via lysine residues. **d**, CsgA monomers to NTA-PEG via his<sub>6</sub> tag. For all fibronectin constructs (a,b,c) RGD epitopes are marked in black.

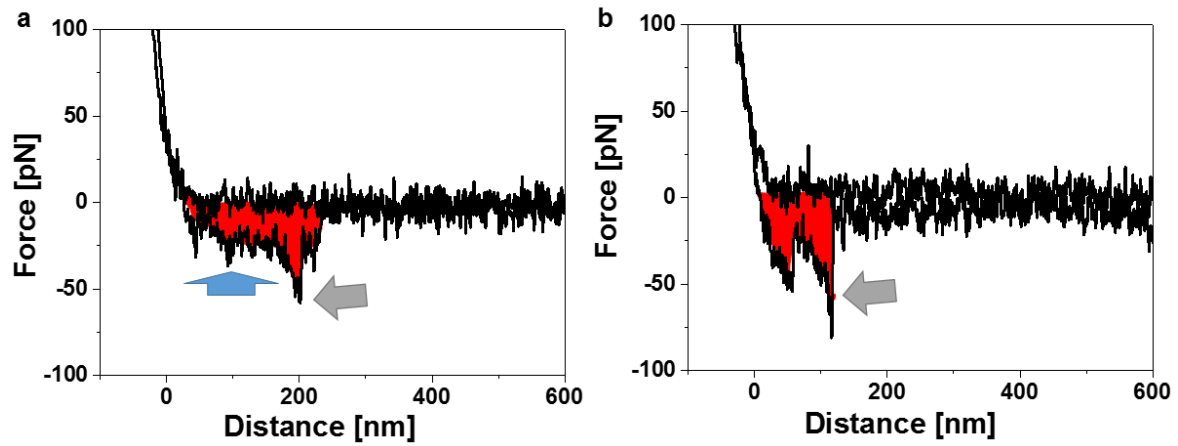

**Figure S2| Typical force-distance curves recorded from RGD/CsgA(+) interactions.** Red area indicates the calculated de-adhesion work. **a**, Blue arrow shows membrane and curli fiber extension during retraction of the RGD-bound AFM tip. **b**, The grey arrow indicates a typical unbinding event between RGD and the CsgA(+) bacterial surface.
